# Supplementary material for: Bacterial species-identifiable magnetic nanosystems for early sepsis diagnosis and extracorporeal photodynamic blood disinfection
Source: Royal Society of Chemistry journal article supplement (doi:10.1039/c7nr06373c), 2017-10-26
Supplement: c7nr06373c1.pdf [file c7nr06373c1.pdf]

## Supporting Information

### **Bacterial species-identifiable magnetic nanosystems for early sepsis diagnosis and extracorporeal photodynamic blood disinfection**

Jianhao Wang,<sup>a</sup> Hao Wu,<sup>a</sup> Yanmei Yang,<sup>\*b</sup> Rong Yan,<sup>b</sup> Yuan Zhao,<sup>a</sup> Yanhao Wang,<sup>b</sup>  
Aihong Chen,<sup>b</sup> Shilong Shao,<sup>b</sup> Pengju Jiang<sup>\*a</sup> and Yong-Qiang Li<sup>\*b</sup>

<sup>a</sup> School of Pharmaceutical Engineering and Life Science, Changzhou University, Changzhou 213164, China

<sup>b</sup> School of Radiation Medicine and Protection, Collaborative Innovation Center of Radiological Medicine of Jiangsu Higher Education Institutions, Jiangsu Provincial Key Laboratory of Radiation Medicine and Protection, Soochow University, Suzhou 215123, China

\*Corresponding Author

E-mail: [yym@suda.edu.cn](mailto:yym@suda.edu.cn) (Yanmei Yang)

[pengju.jiang@gmail.com](mailto:pengju.jiang@gmail.com) (Pengju Jiang)

[lyq@suda.edu.cn](mailto:lyq@suda.edu.cn) (Yong-Qiang Li)

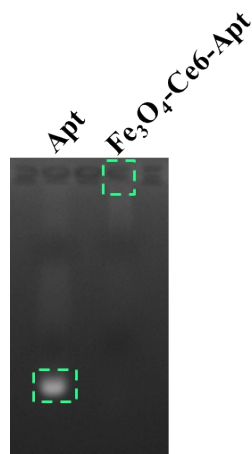

**Fig. S1** Agarose gel electrophoresis of the aptamer and  $\text{Fe}_3\text{O}_4\text{-Ce6-Apt}$  nanosystem. Here the aptamer toward *S. aureus* was used to prepare the  $\text{Fe}_3\text{O}_4\text{-Ce6-Apt}$  nanosystem.

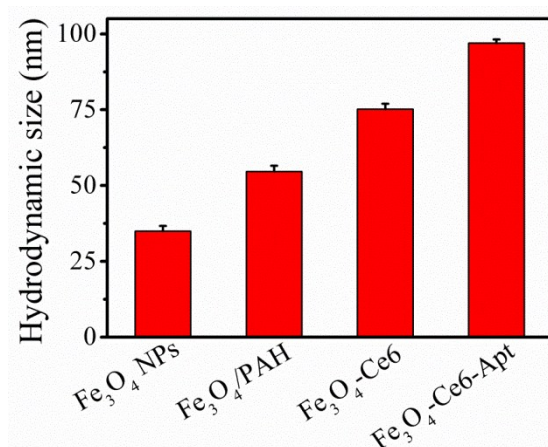

**Fig. S2** Hydrodynamic diameters of  $\text{Fe}_3\text{O}_4$  NPs,  $\text{Fe}_3\text{O}_4/\text{PAH}$ ,  $\text{Fe}_3\text{O}_4\text{-Ce6}$  and  $\text{Fe}_3\text{O}_4\text{-Ce6-Apt}$  in blood. Here the aptamer toward *S. aureus* was used to prepare the  $\text{Fe}_3\text{O}_4\text{-Ce6-Apt}$  nanosystem.

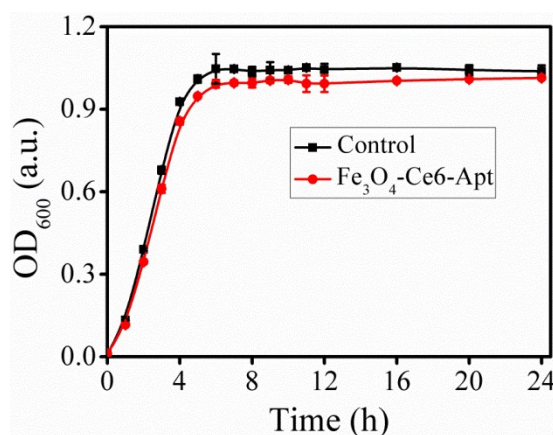

**Fig. S3** Growth curve of *S. aureus* bacteria ( $10^5$  CFU) in the presence of  $\text{Fe}_3\text{O}_4\text{-Ce6-Apt}$  (50  $\mu\text{g}/\text{mL}$  of iron element). Here the aptamer toward *S. aureus* was used to prepare the  $\text{Fe}_3\text{O}_4\text{-Ce6-Apt}$  nanosystem, and the growth of *S. aureus* bacteria without  $\text{Fe}_3\text{O}_4\text{-Ce6-Apt}$  incubation was used as the control.

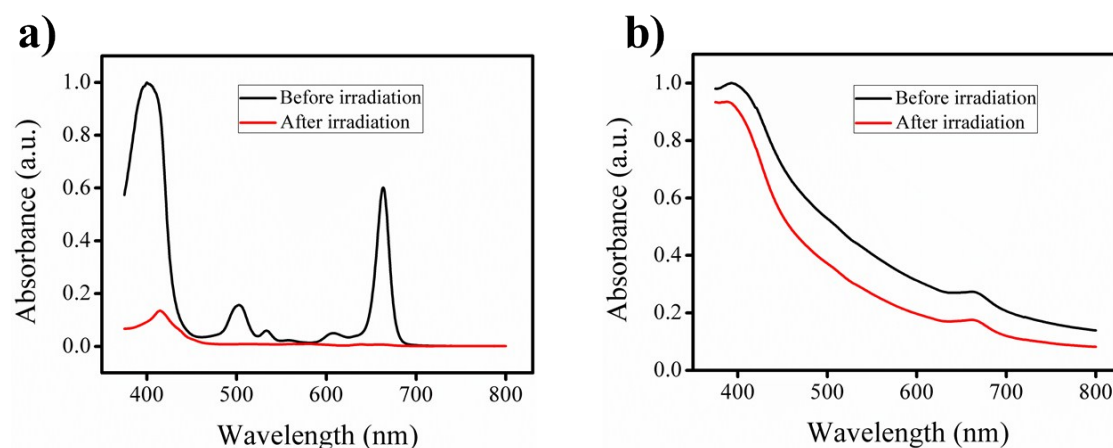

**Fig. S4** The changes of absorption spectra of free Ce6 molecules (a) and  $\text{Fe}_3\text{O}_4\text{-Ce6-Apt}$  (b) solutions before and after NIR laser (660 nm,  $0.8 \text{ W/cm}^2$ ) irradiation for 5 min. Here the aptamer toward *S. aureus* was used to prepare the  $\text{Fe}_3\text{O}_4\text{-Ce6-Apt}$  nanosystem.

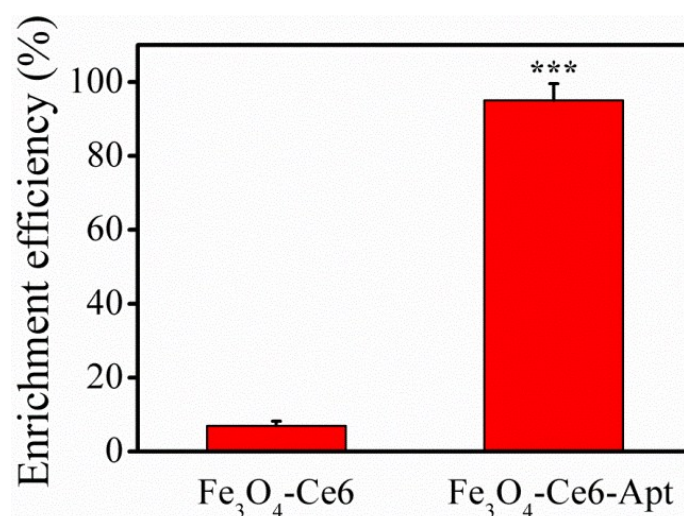

**Fig. S5** Quantitative evaluation of the enrichment efficiencies of the  $\text{Fe}_3\text{O}_4\text{-Ce6}$  ( $50 \mu\text{g/mL}$  of iron element) and  $\text{Fe}_3\text{O}_4\text{-Ce6-Apt}$  nanosystem ( $50 \mu\text{g/mL}$  of iron element) toward *S. aureus* ( $10^6 \text{ CFU}$ ) bacteria. Here the aptamer toward *S. aureus* was used to prepare the  $\text{Fe}_3\text{O}_4\text{-Ce6-Apt}$  nanosystem. The enrichment efficiency is defined as the proportion of bacteria separated from the test blood samples, and its value is given as the mean of three independent experiments and the error bars indicate the SD from the mean. \*\*\* $p < 0.001$ .

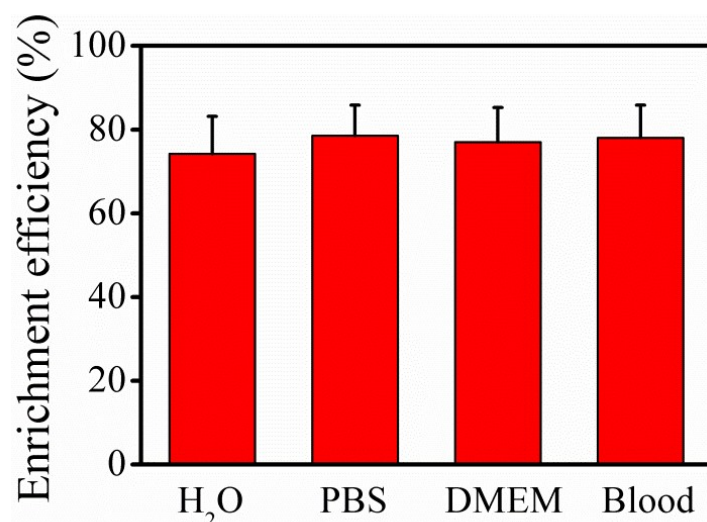

**Fig. S6** Quantitative evaluation of the enrichment efficiency of the Fe<sub>3</sub>O<sub>4</sub>-Ce6-Apt nanosystems (50 µg/mL of iron element) toward *S. aureus* (10<sup>2</sup> CFU) in four different types of sample medium (DI water, PBS, DMEM and blood). Here the aptamer toward *S. aureus* was used to prepare the Fe<sub>3</sub>O<sub>4</sub>-Ce6-Apt nanosystem. The enrichment efficiency is defined as the proportion of bacteria separated from the test blood samples, and its value is given as the mean of three independent experiments and the error bars indicate the SD from the mean.

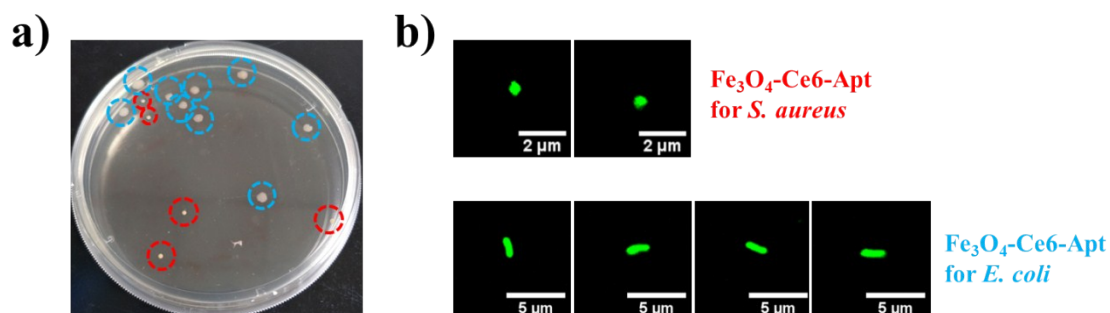

**Fig. S7** a) The agar plate result of one blood sample of sepsis caused by the mixture of *S. aureus* and *E. coli* species using the gold standard bacterial blood culture procedure. The red and blue circles represent the bacterial colony of *S. aureus* and *E. coli* grown on the agar plate, respectively. b) The corresponding fluorescence microscopic result of the same sepsis blood samples based on the Fe<sub>3</sub>O<sub>4</sub>-Ce6-Apt nanosystem-assisted strategy. Here the assay of two Fe<sub>3</sub>O<sub>4</sub>-Ce6-Apt nanosystems (50 µg/mL of iron element) specific for *E. coli* and *S. aureus* respectively, were used.

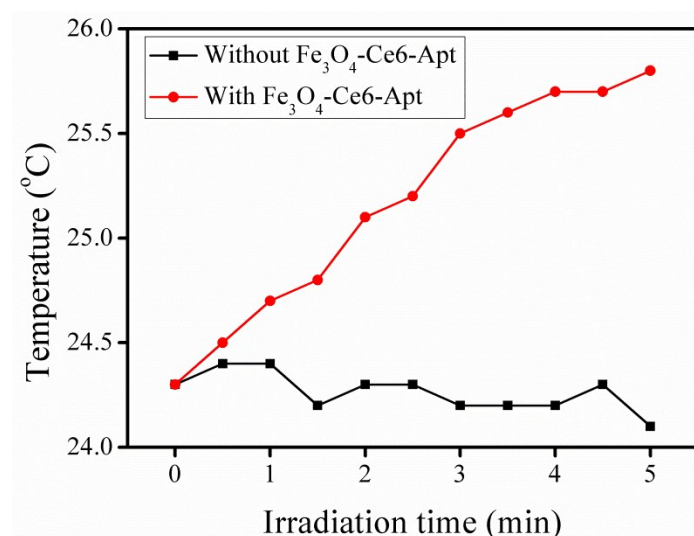

**Fig. S8** Temperature curves of mice blood sample (with and without  $\text{Fe}_3\text{O}_4\text{-Ce6-Apt}$  nanosystem incubation) under NIR laser (660 nm,  $0.8 \text{ W/cm}^2$ ) irradiation. Here the  $\text{Fe}_3\text{O}_4\text{-Ce6-Apt}$  nanosystems ( $50 \mu\text{g/mL}$  of iron element) specific for *S. aureus* was used.

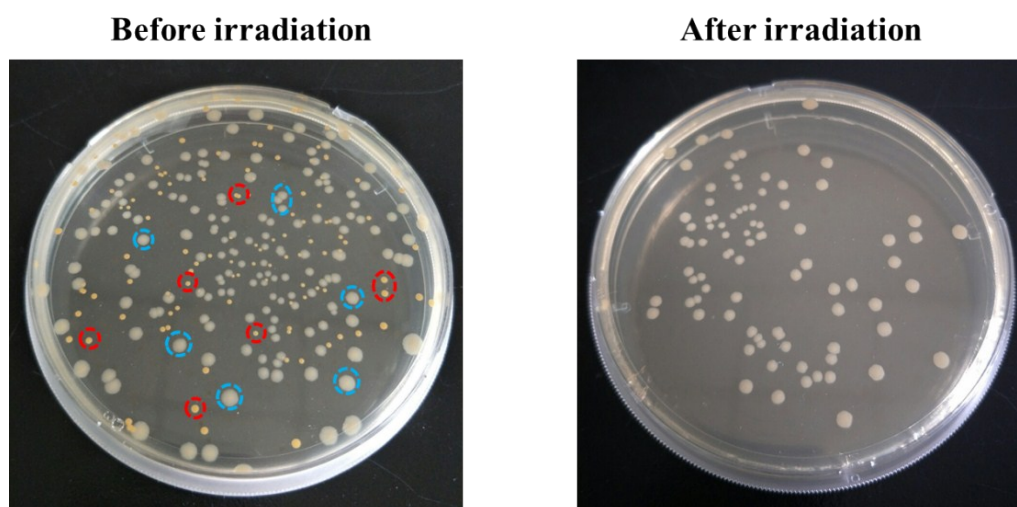

**Fig. S9** Agar plate Photographs of the mixed *S. aureus* ( $10^6 \text{ CFU}$ ) and *E. coli* ( $10^6 \text{ CFU}$ )-spiked blood sample incubated with  $\text{Fe}_3\text{O}_4\text{-Ce6-Apt}$  nanosystem ( $50 \mu\text{g/mL}$  of iron element) before and after NIR laser (660 nm,  $0.8 \text{ W/cm}^2$ ) irradiation for 5 min. Here the aptamer toward *S. aureus* was used to prepare the  $\text{Fe}_3\text{O}_4\text{-Ce6-Apt}$  nanosystem. The red and blue circles indicate the bacterial colony of *S. aureus* and *E. coli* respectively, using the gold standard bacterial blood culture procedure.



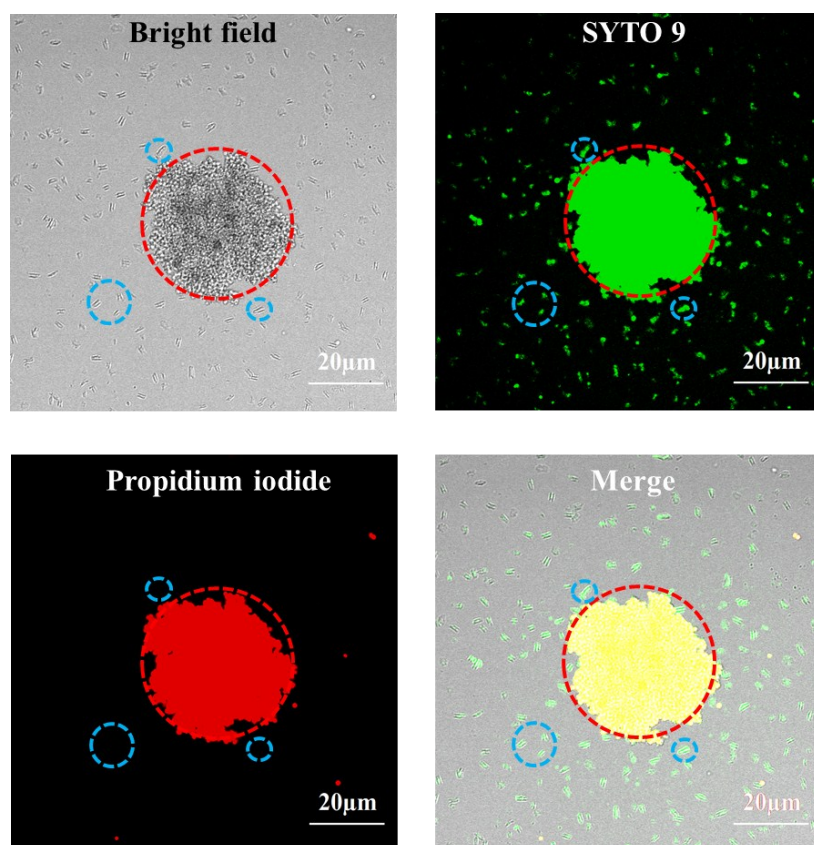

**Fig. S10** Representative images for the live/dead bacterial staining assay the mixed *S. aureus* ( $10^6$  CFU) and *E. coli* ( $10^6$  CFU)-spiked blood sample incubated with  $\text{Fe}_3\text{O}_4$ -Ce6-Apt nanosystem (50  $\mu\text{g}/\text{mL}$  of iron element) after NIR laser (660 nm, 0.8  $\text{W}/\text{cm}^2$ ) irradiation for 5 min. Here the aptamer toward *S. aureus* was used to prepare the  $\text{Fe}_3\text{O}_4$ -Ce6-Apt nanosystem. Two fluorescent dyes were used in which SYTO 9, with a green color, labeled both live and dead bacteria, while propidium iodide, with a red color, stained only dead bacteria. The red and blue circles indicate the *S. aureus* and *E. coli*, respectively.

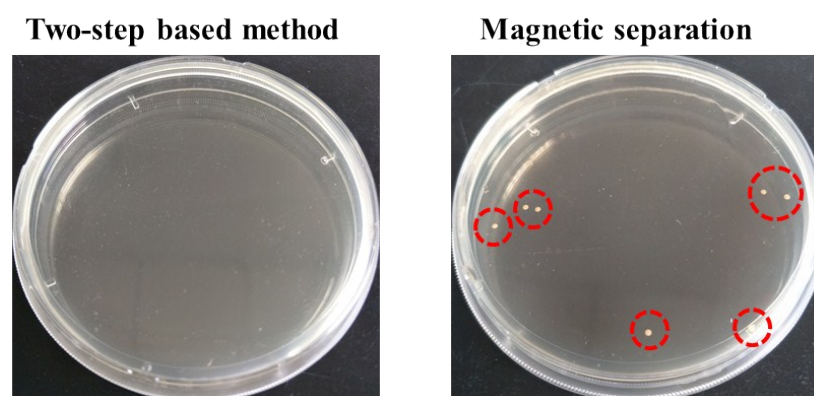

**Fig. S11** Agar plate Photographs of the *S. aureus* ( $10^6$  CFU)-spiked blood sample after the two-step based extracorporeal blood disinfection and pure magnetic separation. The red circles indicate the bacterial colony of *S. aureus* grown on the agar plate.

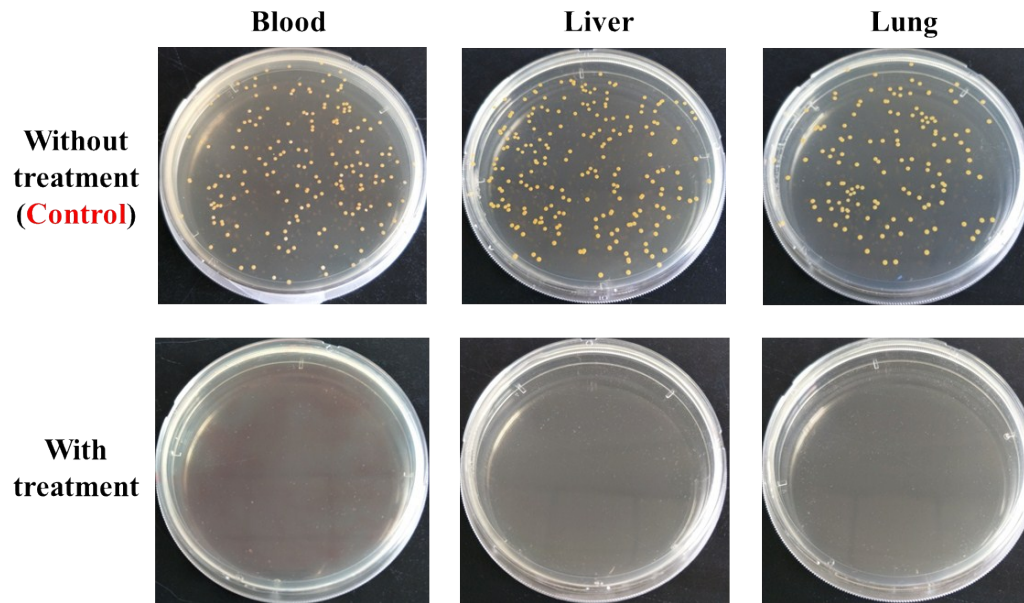

**Fig. S12** Agar plate Photographs of bacterial cultures from the blood, liver and lung tissues of mice transfused with the *S. aureus* ( $10^6$  CFU)-spiked blood samples after disinfection treatment at 10 day post-transfusion. The mice transfused with the *S. aureus* ( $10^6$  CFU)-spiked blood samples without disinfection treatment at 4 day post-transfusion were used as the control.
